# Supplementary material for: Social Media for Nutrition Education—A Randomized Controlled Trial to Promote Fruit and Vegetable Intake in a University Setting: “The University of Valladolid Community Eats Healthy” Study
Source: MDPI journal article supplement (doi:10.3390/nu16091308), 2024-04-26
Supplement: s1 [file s1]

## SUPPLEMENTARY MATERIAL

**Table S1.** Determinants of theory of planned behaviour (TPB), behaviour change technique and activities in the three intervention groups.

| Determinants of TPB          | Behavior change technique                                                                            | VC                                                                                         | Activities IG                                                                                                                                             | FB                                                                                                                                                        |
|------------------------------|------------------------------------------------------------------------------------------------------|--------------------------------------------------------------------------------------------|-----------------------------------------------------------------------------------------------------------------------------------------------------------|-----------------------------------------------------------------------------------------------------------------------------------------------------------|
| Attitude                     | Provide information about health benefits of eating FV.                                              | Webinar 1: “Healthy eating”.                                                               | – Video “healthy eating”. Post- FV servings, FV consumption and health benefits.                                                                          | – Video “healthy eating”. Post- FV servings, FV consumption and health benefits.                                                                          |
|                              | Explaining the types of FV, its nutritional value, seasonality, places to purchase them.             | Webinar 2 and 3: “FV best partners of your health” and “How to be a responsible consumer”. | – Posts: nutritional value of FV, places to buy FV, seasonal calendar of FV, places to buy FV and tips for FV conservation, to be a responsible consumer. | – Posts: nutritional value of FV, places to buy FV, seasonal calendar of FV, places to buy FV and tips for FV conservation, to be a responsible consumer. |
| Subjective norms             | Propose healthy snacking ideas                                                                       | Webinars 5 and 6: “Culinary techniques for FV” and “Healthy snacking ideas with FV”.       | – Posts about FV snacks and recipes.                                                                                                                      | – Posts about FV snacks and recipes.                                                                                                                      |
|                              |                                                                                                      |                                                                                            | – Videos of culinary techniques for FV and healthy snacking.                                                                                              | – Videos of culinary techniques for FV and healthy snacking.                                                                                              |
| Perceived behavioral control | Work on abilities such as healthy menu designing, batch cooking techniques, grocery list development | – Webinars 5 and 3: “Culinary techniques for FV” and “How to be a responsible consumer”.   | – IG Live: “How to plan a healthy menu”.                                                                                                                  | – FB Live: “How to plan a healthy menu”.                                                                                                                  |
|                              |                                                                                                      | – Webinars 4 and 9: “My Plate: Healthy menu planning” and “Batch cooking”.                 | – IG Live: “Batch cooking”.                                                                                                                               | – FB Live: “Batch cooking”.                                                                                                                               |

VC: Virtual campus, FV: fruit and vegetable, IG: Instagram, FB: Facebook

**Table S2a.** Topic, schedule, platform, activities, and materials for the first week of “The U. Valladolid eats healthy” program during week 1.

| GROUP         | TOPIC                       | Platform | IMPLEMENTATION<br>Activities                                                                                                                                                            | SCREENSHOTS, TOOLS, AND MATERIALS.                                                                                                                                                                                                                                                                                                                  |
|---------------|-----------------------------|----------|-----------------------------------------------------------------------------------------------------------------------------------------------------------------------------------------|-----------------------------------------------------------------------------------------------------------------------------------------------------------------------------------------------------------------------------------------------------------------------------------------------------------------------------------------------------|
| <b>WEEK 1</b> |                             |          |                                                                                                                                                                                         |                                                                                                                                                                                                                                                                                                                                                     |
| CONTROL       | Healthy eating <sup>1</sup> | VC       | A document with information about foundations of healthy eating: nutrients, foods, energetic balance, and Mediterranean Diet pattern.                                                   |                                                                                                                                                                               |
| INTERVENTION  | Program presentation        | VC       | <ul style="list-style-type: none"> <li>- Webinars calendar.</li> <li>- Challenges and punctuation.</li> <li>- Welcome vídeo.</li> </ul>                                                 |                                                                                                                                                                               |
|               |                             | IG       | <ul style="list-style-type: none"> <li>- Welcome posts (2)</li> <li>- Post with the weeks and topics of the program.</li> <li>- Post explaining the challenges of each week.</li> </ul> |     |
|               |                             | FB       | <ul style="list-style-type: none"> <li>- Welcome post.</li> <li>- Post with the calendar of the program.</li> <li>- Post with video explaining the challenges of each week.</li> </ul>  |                                                                                      |

Healthy eating<sup>1,2,3</sup>

VC

Webinar 1 (recorded) and pdf document with the content: 1. Nutrients / 2. Food and group food / 3. Dietary patterns / 4. Diet and food guides.

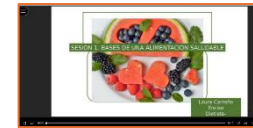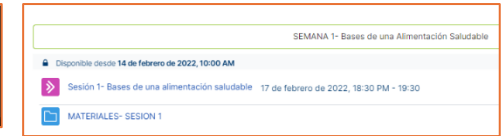

IG

- Post about the objective of the program: to increase FV consumption.
- Video about nutrients, food, and health.
- Post about food and nutrients classification.
- Post about MD pattern
- 3 stories to announce the posts and videos.

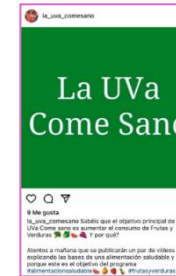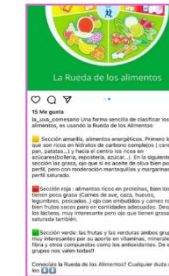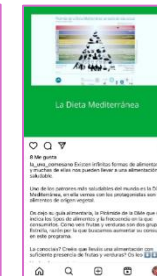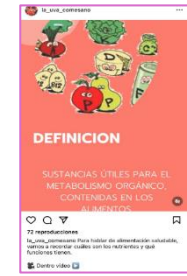

FB

- Post about nutrients and food content in nutrients.
- Video about nutrients and foods
- Post about food classification
- Post about dietary patterns and MD food guide

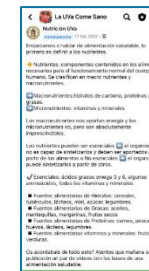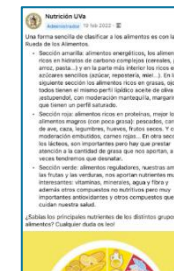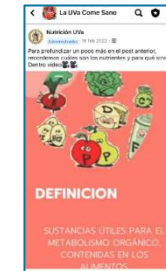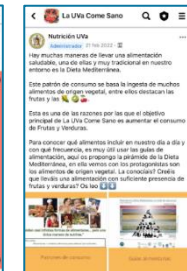

## Challenge nº1 Complete base-line questionnaire (10 points)

VC: Virtual campus, IG: Instagram, FB: Facebook, FV: Fruits and vegetables, MD: Mediterranean Diet.

**Table S2b.** Topic, schedule, platform, activities, and materials for the second week of “The U. Valladolid eats healthy” program during week 2.

| GROUP         | TOPIC                            | Platform | IMPLEMENTATION<br>Activities                                                                                                                                                                                                                                                                                                                                                                                                                                                | SCREENSHOTS, TOOLS, AND MATERIALS.                                                                                                                                                                                                                                                                                                                                                                                                    |
|---------------|----------------------------------|----------|-----------------------------------------------------------------------------------------------------------------------------------------------------------------------------------------------------------------------------------------------------------------------------------------------------------------------------------------------------------------------------------------------------------------------------------------------------------------------------|---------------------------------------------------------------------------------------------------------------------------------------------------------------------------------------------------------------------------------------------------------------------------------------------------------------------------------------------------------------------------------------------------------------------------------------|
| <b>WEEK 2</b> |                                  |          |                                                                                                                                                                                                                                                                                                                                                                                                                                                                             |                                                                                                                                                                                                                                                                                                                                                                                                                                       |
| CONTROL       | MD- principal foods <sup>3</sup> | VC       | A document about the principal food characteristics in MD pattern.                                                                                                                                                                                                                                                                                                                                                                                                          |      |
| INTERVENTION  | FV: health benefits <sup>1</sup> | VC       | <ul style="list-style-type: none"> <li>– Webinar n2 (recorded) about FV benefits, with the content: 1. FV definition / 2. Nutritional value of FV/ 3. Seasonality / 4. Portion size recommended / 5. Health benefits of FV.</li> <li>– Seasonal fruit and vegetable calendar".</li> </ul>                                                                                                                                                                                   |                                                                                                                                                                                                                                                                                                                                                                                                                                       |
|               |                                  | IG       | <ul style="list-style-type: none"> <li>– Post about vegetables: types, definition, nutritional content.</li> <li>– Post about fruits: classification, definition, nutritional content.</li> <li>– Post about seasonality and seasonal calendar of fruits and vegetables.</li> <li>– Post about portion size recommended for vegetables.</li> <li>– Post about portion size recommended for fruits.</li> <li>– Post about FV consumption and benefits for health.</li> </ul> |                                                                                                                                                                                                                                                                                                                                                                                                                                       |
|               |                                  | FB       | <ul style="list-style-type: none"> <li>– Post about vegetables, types, classification, and its nutritional value.</li> <li>– Post about fruits: types, classification, and nutritional value.</li> <li>– Post with seasonal FV calendar.</li> <li>– Post about seasonality of FV.</li> <li>– Post with video about FV portion size recommended.</li> <li>– Post about health benefits of consuming enough FV.</li> </ul>                                                    |                                                                                                                                                                                                                                                                                                                                                                                                                                       |

**Challenge n°2 Simple recipe of F or V (10 points)**

VC: Virtual campus, IG: Instagram, FB: Facebook, FV: Fruits and vegetables, MD: Mediterranean Diet.

**Table S2c.** Topic, schedule, platform, activities, and materials for the third week of “The U. Valladolid eats healthy” program during week 3.

| GROUP                                                       | TOPIC                                                        | Platform | IMPLEMENTATION<br>Activities                                                                                                                                                                                                                                    | SCREENSHOTS, TOOLS AND MATERIALS.                                                    |
|-------------------------------------------------------------|--------------------------------------------------------------|----------|-----------------------------------------------------------------------------------------------------------------------------------------------------------------------------------------------------------------------------------------------------------------|--------------------------------------------------------------------------------------|
| WEEK 3                                                      |                                                              |          |                                                                                                                                                                                                                                                                 |                                                                                      |
| CONTROL                                                     | MD-A lifestyle <sup>3</sup>                                  | VC       | A document about the non-nutritional characteristics of MD pattern.                                                                                                                                                                                             | 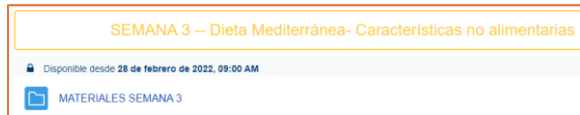  |
| INTERVENTION                                                | Shopping FV: tips, places, conservation methods <sup>1</sup> | VC       | <ul style="list-style-type: none"><li>– Webinar nº 3 (recorded): “How to be a responsible consumer”. Content: 1. Food waste, 2. Responsible consumer (tips before, during and after shopping food), 3. FV conservation.</li><li>– Shopping list model</li></ul> |   |
|                                                             |                                                              | IG       | <ul style="list-style-type: none"><li>– Post with tips of how to be a responsible consumer.</li><li>– 4 stories about food waste with a questionnaire.</li><li>– 3 stories about FV conservation.</li></ul>                                                     |   |
|                                                             |                                                              | FB       | <ul style="list-style-type: none"><li>– 4 posts with a questionnaire about food waste</li><li>– Post about food waste, and tips on how to be a responsible consumer.</li><li>– 2 infographics about FV correct conservation.</li></ul>                          |  |
| Challenge nº3 Recipe using processed F and/or V (15 points) |                                                              |          |                                                                                                                                                                                                                                                                 |                                                                                      |

VC: Virtual campus, IG: Instagram, FB: Facebook, FV: Fruits and vegetables, MD: Mediterranean Diet.

**Table S2d.** Topic, schedule, platform, activities, and materials for the fourth week of “The U. Valladolid eats healthy” program during week 4.

| GROUP                                                                                      | TOPIC                                  | Platform | IMPLEMENTATION<br>Activities                                                                                                                                               | SCREENSHOTS, TOOLS, AND MATERIALS.                                                                                                                                        |
|--------------------------------------------------------------------------------------------|----------------------------------------|----------|----------------------------------------------------------------------------------------------------------------------------------------------------------------------------|---------------------------------------------------------------------------------------------------------------------------------------------------------------------------|
| WEEK 4                                                                                     |                                        |          |                                                                                                                                                                            |                                                                                                                                                                           |
| CONTROL                                                                                    | MD-Food guide, MD pyramid <sup>3</sup> | VC       | A document explaining the dietary pyramid of MD for Spanish population.                                                                                                    |                                                                                        |
| INTERVENTION                                                                               | Healthy menu planning with “My Plate”  | VC       | Webinar nº4 (recorded): “My Plate: healthy menu planning”. Content: 1. Healthy eating / 2. Food guides / 3. My plate guide / 4 Healthy menu planning.                      |                                                                                        |
|                                                                                            |                                        | IG       | <ul style="list-style-type: none"><li>– Instagram live: “My Plate: healthy menu planning”.</li><li>– Post with a menu scheme to help with healthy menu planning.</li></ul> |     |
|                                                                                            |                                        | FB       | <ul style="list-style-type: none"><li>– Facebook live: “My Plate: healthy menu planning”.</li><li>– Post with a menu scheme to help with healthy menu planning.</li></ul>  |   |
| Challenge nº4     Cooking 3 meals (lunch or dinner) following “My Plate” guide (20 points) |                                        |          |                                                                                                                                                                            |                                                                                                                                                                           |

VC: Virtual campus, IG: Instagram, FB: Facebook, FV: Fruits and vegetables, MD: Mediterranean Diet.



**Table S2e.** Topic, schedule, platform, activities, and materials for the fifth week of “The U. Valladolid eats healthy” program during week 5.

| GROUP                                                                                   | TOPIC                                     | Platform | IMPLEMENTATION<br>Activities                                                                                                                                                                                                                                                                      | SCREENSHOTS, TOOLS, AND MATERIALS.                                                    |
|-----------------------------------------------------------------------------------------|-------------------------------------------|----------|---------------------------------------------------------------------------------------------------------------------------------------------------------------------------------------------------------------------------------------------------------------------------------------------------|---------------------------------------------------------------------------------------|
| WEEK 5                                                                                  |                                           |          |                                                                                                                                                                                                                                                                                                   |                                                                                       |
| CONTROL                                                                                 | Health benefits of MD <sup>3</sup>        | VC       | A document explaining health benefits associated with MD dietary pattern.                                                                                                                                                                                                                         |    |
| INTERVENTION                                                                            | Cooking FV: culinary techniques and tips. | VC       | <ul style="list-style-type: none"><li>Webinar nº5 :” Hands-on Cooking - Tips for Cooking Fruits and Vegetables”. Content: 1. Nutritional value and culinary techniques, 2. Different culinary techniques, 3. Original recipes to cook FV.</li><li>Original recipes ideas for cooking FV</li></ul> |    |
|                                                                                         |                                           | IG       | <ul style="list-style-type: none"><li>Post about different types of culinary techniques</li><li>2 posts with videos about culinary techniques and nutritional value.</li><li>2 posts with original recipes for FV</li></ul>                                                                       |    |
|                                                                                         |                                           | FB       | <ul style="list-style-type: none"><li>Post about the different culinary techniques most employed.</li><li>2 posts with videos about culinary techniques and nutritional value.</li><li>2 posts with original recipes for FV</li></ul>                                                             |  |
| Challenge nº5    1 or 2 recipes using innovative culinary techniques for FV (25 points) |                                           |          |                                                                                                                                                                                                                                                                                                   |                                                                                       |

VC: Virtual campus, IG: Instagram, FB: Facebook, FV: Fruits and vegetables, MD: Mediterranean Diet.

**Table S2f.** Topic, schedule, platform, activities, and materials for the sixth week of “The U. Valladolid eats healthy” program during week 6.

| GROUP                                                                 | TOPIC                               | Platform | IMPLEMENTATION Activities                                                                                                                                              | SCREENSHOTS, TOOLS AND MATERIALS.                                                    |
|-----------------------------------------------------------------------|-------------------------------------|----------|------------------------------------------------------------------------------------------------------------------------------------------------------------------------|--------------------------------------------------------------------------------------|
| WEEK 6                                                                |                                     |          |                                                                                                                                                                        |                                                                                      |
| CONTROL                                                               | How to practice MD on a daily basis | VC       | A document with an example of a MD menu scheme, and traditional Spanish MD recipes.                                                                                    | 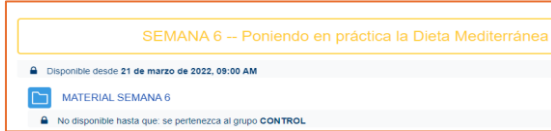  |
| INTERVENTION                                                          | Healthy snacking with FV            | VC       | <ul style="list-style-type: none"><li>Webinar nº6: “Healthy snacking with FV”. Content: 1. Daily meals, 2. Breakfast and snacking, 3. Healthy snacks with FV</li></ul> |   |
|                                                                       |                                     | IG       | <ul style="list-style-type: none"><li>Post about how many meals a day should be recommended.</li><li>Post with original recipes for snacks of FV</li></ul>             |   |
|                                                                       |                                     | FB       | <ul style="list-style-type: none"><li>Post about the number of meals a day recommended.</li><li>3 posts with original recipes for snacks of FV</li></ul>               |  |
| Challenge nº 6    Preparing 3 healthy snacks to take away (25 points) |                                     |          |                                                                                                                                                                        |                                                                                      |

VC: Virtual campus, IG: Instagram, FB: Facebook, FV: Fruits and vegetables, MD: Mediterranean Diet.



**Table S2g.** Topic, schedule, platform, activities, and materials for the seventh week of “The U. Valladolid eats healthy” program during week 7.

| GROUP         | TOPIC                                   | Platform | IMPLEMENTATION<br>Activities                                                                                                                                                                                                  | SCREENSHOTS, TOOLS AND MATERIALS.                                                     |
|---------------|-----------------------------------------|----------|-------------------------------------------------------------------------------------------------------------------------------------------------------------------------------------------------------------------------------|---------------------------------------------------------------------------------------|
| <b>WEEK 7</b> |                                         |          |                                                                                                                                                                                                                               |                                                                                       |
| CONTROL       | Myths of the MD                         | VC       | -A questionnaire about myths of MD<br>-A document analysing the myths proposed and debunking them.                                                                                                                            |    |
| INTERVENTION  | Batch cooking: healthy menus for a week | VC       | - Webinar nº 7 (recorded): “Batch cooking: healthy menus in 2h cooking”. Content: 1. Definition of Batch cooking: advantages and disadvantages, 2. How to plan a menu for batch cooking, 3. Menus examples for batch cooking. |    |
|               |                                         | IG       | - Instagram Live: “Batch cooking: healthy menus in 2h cooking”<br>-Post with video about the benefits of batch cooking<br>-Post with a menu adapted to batch cooking                                                          |    |
|               |                                         | FB       | -Facebook Live: “Batch cooking: healthy menus in 2h cooking”<br>-Post with video about the benefits of batch cooking<br>-Post with a menu adapted to batch cooking                                                            |  |

**Challenge nº 7    Cooking 3 meals with batch cooking design (30 points) + Completing post-intervention survey (10 points)**

VC: Virtual campus, IG: Instagram, FB: Facebook, FV: Fruits and vegetables, MD: Mediterranean Diet.

1. Agencia Española de Seguridad Alimentaria (AESAN). Recomendaciones dietéticas saludables y sostenibles complementadas con recomendaciones de actividad física para la población española. Come sano, muévete y cuida tu planeta. AESAN; 2022. Disponible en: [https://www.aesan.gob.es/AECOSAN/docs/documentos/nutricion/RECOMENDACIONES\\_DIETETICAS.pdf](https://www.aesan.gob.es/AECOSAN/docs/documentos/nutricion/RECOMENDACIONES_DIETETICAS.pdf)
2. Aranceta-Bartrina J, Partearroyo T, López-Sobaler AM, Ortega RM, Varela-Moreiras G, Serra-Majem L, Pérez-Rodrigo C; Col-laborative Group for the Dietary Guidelines for the Spanish Population (SENC). Updating the Food-Based Dietary Guidelines for the Spanish Population: The Spanish Society of Community Nutrition (SENC) Proposal. *Nutrients*. 2019 ;11(11):2675. doi: 10.3390/nu11112675
3. Serra-Majem L, Tomaino L, Dernini S, Berry EM, Lairon D, de la Cruz JN, et al. Updating the mediterranean diet pyramid to-wards sustainability: Focus on environmental concerns. *Int J Environ Res Public Health*. 2020 ;17(23):1–20
